## 22 **Abstract**

23 Many species synchronize their physiology and behavior to specific hours. It is commonly assumed that  
24 sunlight acts as the main entrainment signal for ~24h clocks. However, the moon provides similarly  
25 regular time information, and increasingly studies report correlations between diel behavior and  
26 lunidian cycles. Yet, mechanistic insight into the possible influences of the moon on ~24hr timers is  
27 scarce.

28 We studied *Platynereis dumerilii* and uncover that the moon, besides its role in monthly timing, also  
29 schedules the exact hour of nocturnal swarming onset to the nights' darkest times. Moonlight adjusts  
30 a plastic clock, exhibiting <24h (moonlit) or >24h (no moon) periodicity. Abundance, light sensitivity,  
31 and genetic requirement indicate *Platynereis* r-Opn1 as receptor to determine moonrise, while the  
32 cryptochrome L-Cry is required to discriminate between moon- and sunlight valence. Comparative  
33 experiments in *Drosophila* suggest that Cryptochrome's requirement for light valence interpretation is  
34 conserved. Its exact biochemical properties differ, however, between species with dissimilar timing  
35 ecology.

36 Our work advances the molecular understanding of lunar impact on fundamental rhythmic processes,  
37 including those of marine mass spawners endangered by anthropogenic change.

38

## 39 Main text

### 40 A moonlight-sensitive clock times swarming behavior

41 *Platynereis dumerilii* reproduces by nocturnal mass spawning, with sexually mature males and females  
 42 synchronously raising from seagrass to the water surface (Fig. 1A) during the night (1). While it is well  
 43 established that this spawning is synchronized to specific nights of the month by a circalunar oscillator  
 44 (refs. (2, 3) and accompanying manuscript by Poehn, Krishnan et al), we reasoned that it should further  
 45 increase reproductive success if worms synchronized the onset of swarming behavior also to specific  
 46 hours during those nights. In fact, such an interconnection of different timing systems is well  
 47 established for polychaete relatives like the palolo worms (4) and fireworms (*Odontosyllis*) (5).

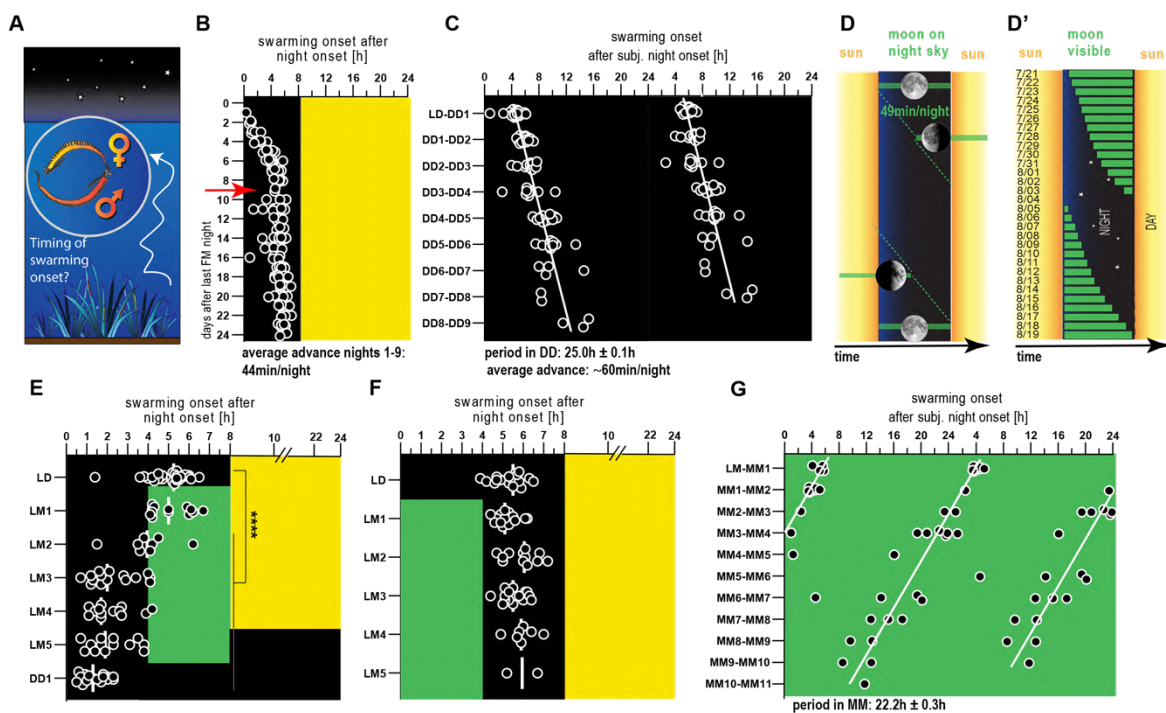

48

49 **Figure 1 | A moonlight sensitive plastic circadian/circalunidian clock (PCC) times swarming onset to darkness. (A)**  
 50 Schematized swarming behavior of *Platynereis dumerilii*. **(B)** Swarming onset of individual, separated worms across different  
 51 days of an artificial lunar month, were worms receive 8 nights continuous nocturnal light (=full moon: FM) every month in  
 52 addition to a 16h:8h LD cycle (for details see (6), accompanying manuscript Poehn, Krishnan et al). Red arrow in indicates  
 53 days relative to the circalunar cycle from which onwards worms were used for all subsequent experiments (except Fig.2 F and  
 54 G). **(C,G)** Swarming onset of worms released into constant darkness (DD; D) or constant moonlight (MM; G). Data are double-  
 55 plotted for better visualization. White lines are linear regression lines. Period lengths were calculated based on the slope of  
 56 the regression line ± the 95% CI of the slope. **(D,D')** Schemes illustrating moon rise and set times in a simplified averaged  
 57 model (D) and the natural situation (Bay of Naples, July/August 1929) (D'). See:  
 58 <https://www.timeanddate.com/moon/italy/naples> **(E,F)** Swarming onset of worms subjected to naturalistic moonlight during  
 59 the second (E) or first (F) half of the night. black: no light, yellow: naturalistic sunlight, green: naturalistic moonlight.

60 This prompted us to investigate if *Platynereis dumerilii* also exhibits preferred hours of spawning. We  
 61 placed maturing, monthly (circalunar) entrained *Platynereis dumerilii* adults (3) in individual wells of  
 62 our automated behavioral recording device (7). As swarming is accompanied by a burst of swimming  
 63 activity (“nuptial dance”), analysis by automated video tracking allowed us to systematically deduce

64 the time of swarming onset with respect to the daylight/darkness (LD:16:8h) cycle (fig. S1A,B  
65 Supplementary Video 1). Analyses of 139 individuals revealed that swarming onset across the culture  
66 was indeed synchronized to a ~1-2hr window during the night (Fig. 1B). (Note that we selected about  
67 equal numbers of spawning worms/night. Therefore, the monthly spawning synchronization is  
68 invisible.) The precise time point depended on the time since the last artificial “full moon” (FM) night  
69 (Fig. 1B), which is provided to entrain the worms’ monthly oscillator (3). In nights directly following the  
70 last “full moon” night, animals started the characteristic swarming behavior directly following night  
71 onset. This onset of swarming gradually shifted by app. 44min/night within the first 8 nights (Fig.1B:  
72 days preceding the red arrow). For the remaining lunar month, the time of swarming onset remained  
73 unaltered at ~5 h after night onset (Fig. 1B, fig. S1B). To assess whether this synchronization was driven  
74 by an endogenous oscillator, we next monitored swarming onset in worms that were kept in constant  
75 darkness for several days. Under these dark-dark (DD) conditions, swarming was still synchronously  
76 initiated, with an average delay of  $\sim 1\text{h} \pm 0,1\text{h}$  per day (Fig 1C). This established that the specific hour  
77 of nocturnal swarming onset is controlled by an endogenous clock.

78 The time advance of about 44min within the first 8 nights after full moon is reminiscent of the average  
79 delay of the rise of the waning moon ( $\sim 49\text{min/night}$ , Fig. 1D). This apparent delay of moon rise time  
80 relative to sunset is caused by the period difference of the daily solar cycle (24h) and the lunidian cycle  
81 (24.8h; the average timespan between two successive moon rises) (Fig. 1D). The latter matches the  
82 period length of the endogenous clock ( $\sim 25\text{h}$ ) controlling swarming onset under DD conditions  
83 (compare Fig. 1C,D). The combination of these facts let us speculate that this timing system could help  
84 to synchronize *Platynereis* swarming onset to the darkest hours of the night, but would require the  
85 moon for entrainment. Furthermore, the exact change of moon rise relative to sunset is not always  
86 exactly  $\sim 49\text{min/night}$ , but varies under natural conditions (Fig. 1D’), making an additional adjustment  
87 by moonlight likely advantageous. We thus next studied if the endogenous clock was sensitive to  
88 moonlight for its exact entrainment. To mimic moonlight and sunlight under laboratory conditions, we  
89 complemented available surface measurements (8) by analyzing systematic light measurements at a  
90 natural habitat of *Platynereis* (fig. S2A), which guided the design of “naturalistic sunlight” and  
91 “naturalistic moonlight” illumination devices (fig. S2B, see also accompanying manuscript Poehn,  
92 Krishnan et al, and ref. (7)).

93 We next exposed animals ( $\geq 9$  days after the end of the monthly nocturnal light stimulus, see red  
94 arrow Fig. 1B) to “naturalistic moonlight” (fig. S2B) provided during the second half of the night for 5  
95 consecutive nights (Fig. 1E, LM1-5). In response to this light regime mimicking “waning moon”, worms  
96 shifted their swarming onset gradually into the dark portion of these “moonlit” nights (Fig. 1E). The  
97 advanced swarming onset caused by the “waning moonlight regime” persisted when worms were  
98 subsequently released into constant darkness (Fig. 1E: DD1), arguing that this shift was caused by an

99 impact of moonlight on the endogenous clock, rather than being an acute masking effect (i.e. direct  
100 response to light). Consistent with timing the dark portion of the night, the same “naturalistic  
101 moonlight” provided during the first half of the night (mimicking times of waxing moon) did not impact  
102 on the worms’ hourly timing (Fig. 1F). Finally, under a constant “naturalistic moonlight” (MM) regime,  
103 spawning onset remained synchronized, but occurred with a markedly decreased period length of  
104  $\sim 22.2\text{h} \pm 0.4\text{h}$ , compared to DD conditions (Fig. 1C vs. G).

105 Taken together, these results suggest the existence of a plastic oscillator system that regulates  
106 nocturnal swarming onset, whose period is modulated by naturalistic moonlight. This results in a  
107 swarming preference during the dark portion of the night, consistent with natural observations. We  
108 refer to this clock as plastic circadian/circalunidian clock (PCC clock).

## 109 L-Cry is required to correctly interpret sun– and moonlight

110 In order to understand how (naturalistic) sun– and moonlight are sensed and distinguished by this  
111 system, we next sought to identify photoreceptor(s) relevant for the light impact on the PCC clock. One  
112 candidate receptor of particular interest was *Platynereis* L-Cryptochrome (L-Cry), whose distant  
113 homolog Cry2 in the coral *Acropora* has been speculated to mediate moonlight sensation based on  
114 expression changes (9).

115 To assess if L-Cry is relevant for light input into the PCC clock, we analyzed a *Platynereis l-cry* loss-of-  
116 function strain (see accompanying manuscript Poehn, Krishnan et al). When exposed to constant  
117 darkness, *l-cry*<sup>-/-</sup> individuals still exhibited rhythmic initiation of swarming onset, with a period length  
118 ( $24.6\text{h} \pm 0.3\text{h}$ ) indistinguishable from wildtypes (Fig. 2A). This indicates that L-Cry is not required for  
119 the endogenous oscillation of the PCC clock.

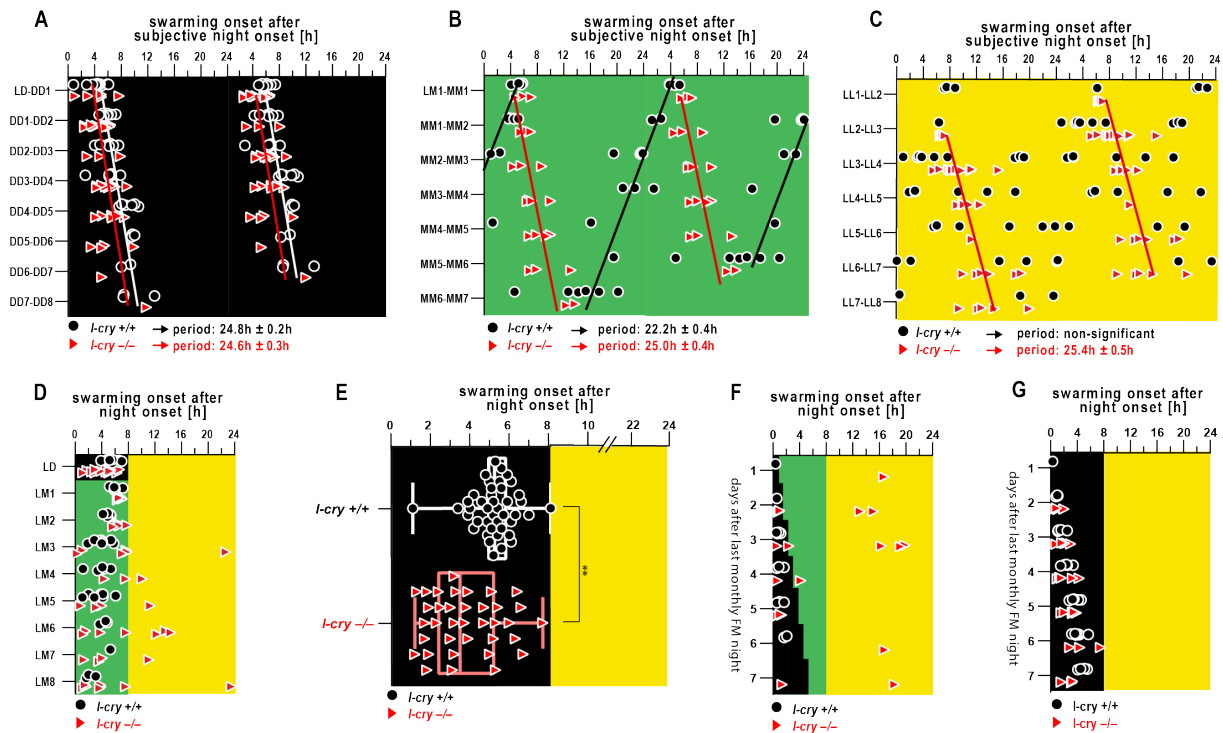

120

121 **Figure 2. | *Platynereis* L-Cry enables the PCC to distinguish sun- versus moonlight. (A-E)** Swarming onset of *I-cry* mutants  
 122 (red triangles) and wildtypes (black circles) entrained to 16:8h LD cycles subsequently released into (A) constant darkness  
 123 (DD), (B) constant naturalistic moonlight (MM), or (C) constant naturalistic sunlight (LL), or (D) subjected to alternations of  
 124 naturalistic sunlight during the day and moonlight during the night (LM) or (E) maintained under 16:8h LD cycles (\*\**p*=0.004,  
 125 F-test to test if the variances in the two groups are significantly different). Data in A-C are double-plotted. Black and red lines  
 126 indicate linear regression lines of wildtype and *I-cry*<sup>-/-</sup> mutants, respectively. The period length was calculated based on the  
 127 slope of the regression line ± the 95% CI of the slope. (F) Swarming onset of *I-cry* mutants and wildtypes assessed directly  
 128 after the monthly nocturnal full moon (FM) light stimulus and kept either under LD cycles (F) or with an additional waning  
 129 moonlight regime (G).

130

131 To probe for roles of L-Cry in mediating light input into the PCC clock, we next investigated spawning  
 132 rhythmicity in *I-cry* mutants exposed to constant “naturalistic moonlight” (MM) or “naturalistic sun  
 133 light” (LL). Under both conditions, *I-cry* mutants exhibited a synchronized swarming onset, with period  
 134 lengths (MM: 25h ± 0.4h; Fig. 2B; LL: 25.4h ± 0.5h. Fig. 2C) highly reminiscent of the period of wildtype  
 135 in DD conditions (Fig. 2A). In contrast, wildtype siblings shortened their period (MM) or became  
 136 arrhythmic (LL), respectively (Fig. 2B,C). These clear differences between wildtype and mutants let us  
 137 conclude that L-Cry is relevant for the conveying naturalistic sun- and moonlight information to the  
 138 PCC clock.

139 The absent adjustment of the PCC clock in *I-cry*<sup>-/-</sup> individuals to respond to light could be explained by  
 140 a general reduction in light sensitivity. Alternatively, these findings are compatible with a role of L-Cry  
 141 in distinguishing moon- and sunlight, as L-Cry enables the PCC clock to respond differently to the two  
 142 light conditions. To discriminate between the two possibilities, we exposed *I-cry* mutants to a day/night  
 143 regime of 16h:8h, where they were exposed to “naturalistic sunlight” during the day, and “naturalistic  
 144 moonlight” during the night (LM) (Fig 2D). Unlike wildtype animals, that restricted swarming onset

145 strictly to nocturnal hours, *l-cry* mutants exhibited aberrant swarming onset. Starting with 3 days of  
146 the LM regime, around a quarter of the recorded animals initiated swarming during the day, a  
147 phenomenon never observed for wildtype animals (Fig. 2D). In contrast, in LD conditions all *l-cry*  
148 mutants restricted swarming onset to the night, albeit less synchronized than wildtype, (Fig. 2D:  
149 LD, Fig. 2E), indicating that the shifted timing into the day was caused by the naturalistic moonlight  
150 stimulus. The abnormal swarming onset of *l-cry*<sup>-/-</sup> animals was also observed in a light regime in which  
151 a staggered, artificial waning moonlight regime (fig. S2C) was provided directly after the end of the  
152 standard monthly culture FM stimulus, more closely mimicking the natural timing under which  
153 swarming is observed (Fig. 2F, compare Fig. 1D, D') compared to the identical time and light regime  
154 lacking the waning moon stimulus (Fig. 2G). Overall, this suggests that the *l-cry* mutation does not  
155 simply render worms less sensitive to moonlight, but that L-Cry is required to correctly interpret  
156 naturalistic moonlight versus sunlight stimuli.

## 157 Subcellular localization and stability of L-Cry supports distinct 158 signaling under moonlight and sunlight conditions

159 In the common view based on the work in *Drosophila melanogaster*, the fly homolog of L-Cry – dCry –  
160 undergoes light dependent binding to Timeless, which leads to the degradation of both Timeless and  
161 dCry, by this resetting the flies' circadian clock upon light input (reviewed in ref. (10)). This binary  
162 signaling model is difficult to reconcile with our finding that *Platynereis* L-Cry is relevant for  
163 distinguishing between different light valences in the context of circadian/circalunidian timing.

164 We therefore tested if L-Cry protein in the worm exhibited any differences when animals were exposed  
165 to naturalistic sun–or moonlight under conditions relevant for the above behavioral paradigms. We  
166 made use of a *Pdu*-L-Cry-specific antibody (for antibody generation and validation see accompanying  
167 manuscript Poehn, Krishnan et al). We first assessed L-Cry abundance in head extracts of animals  
168 sampled at the midpoint of the subjective night (at new moon: NM), after 4h of darkness or exposure  
169 to either naturalistic sun- or moonlight (Fig. 3A, CT20, red arrows). As expected by the canonical  
170 *Drosophila* model and consistent with our previous analyses in S2 cells (3), naturalistic sunlight led to  
171 a significant reduction of L-Cry compared to heads sampled from animals maintained in darkness (Fig.  
172 3B,C). In contrast, the levels of L-Cry protein in the heads of naturalistic moonlight-exposed animals  
173 was indistinguishable from dark levels (Fig. 3B,C).

174 Immunohistochemical analyses at two distinct time points during the first subjective night of the  
175 respective light regime (CT20; CT0, black arrows Fig. 3A), and the following mid-day point (CT12, black  
176 arrows Fig. 3A) revealed that in naturalistic moonlight, L-Cry was predominantly localized in the nuclei  
177 of the eye photoreceptors and of cells in the posterior oval-shaped brain domain (Fig. 3D-H' and insets,

178 for comparison to light/dark conditions: fig. S3). By contrast, residual immunoreactivity of L-Cry under  
 179 naturalistic sunlight appeared to be predominantly localized to the cytosol (insets Fig. 3E-I'), in line  
 180 with a sunlight-dependent degradation pathway.

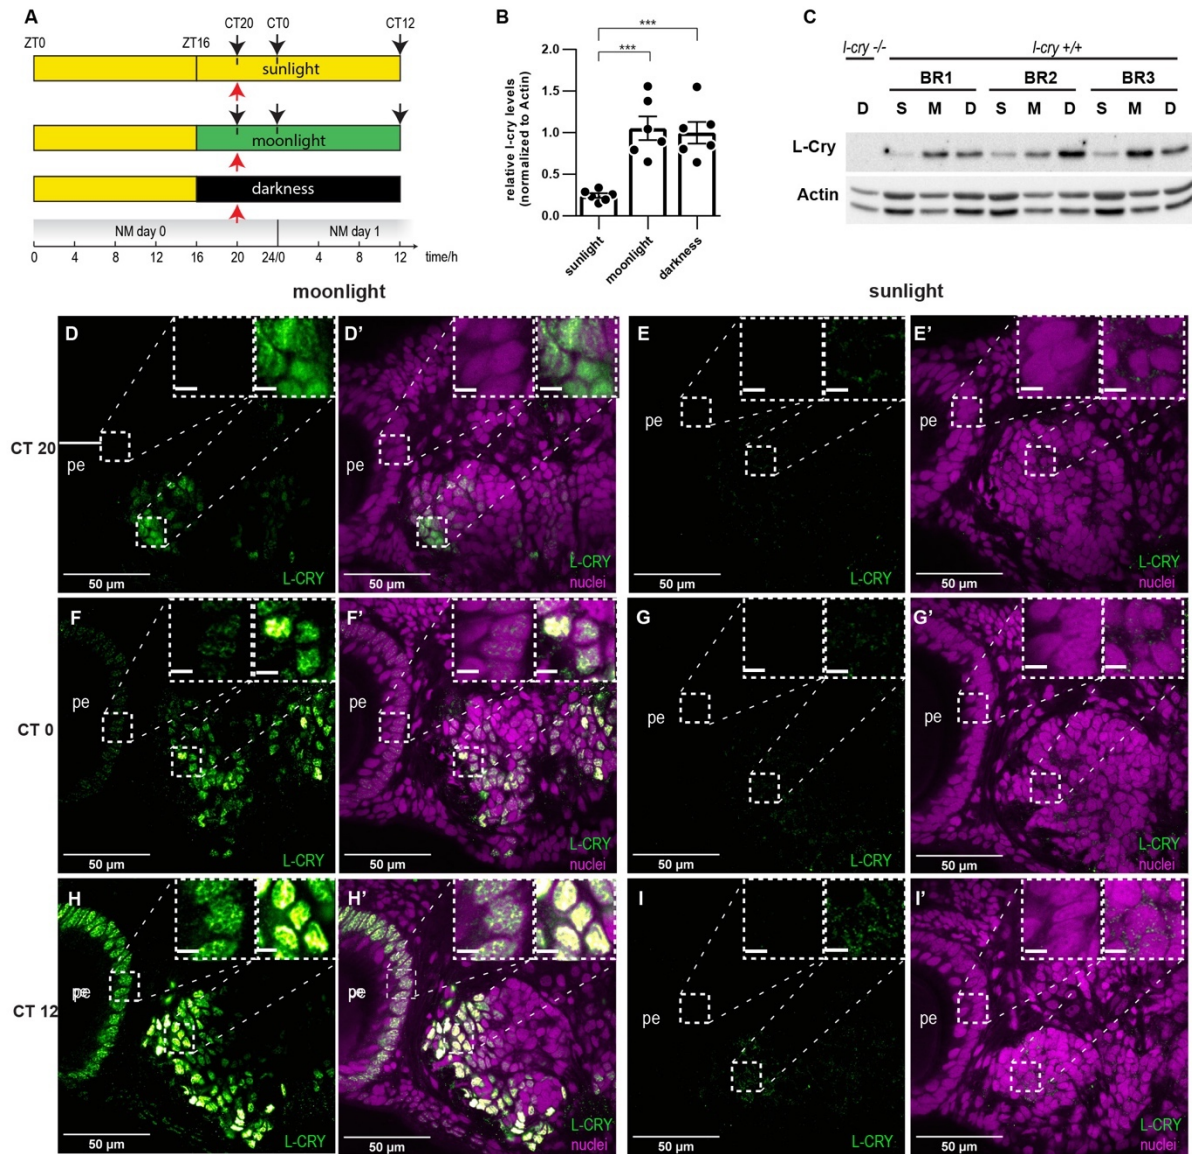

181

182 **Figure 3 | *Pdu*-L-Cry abundance and localization under darkness, naturalistic sun- and moonlight.** (A) Sampling scheme of  
 183 *Platynereis* heads for Western blot and immunohistochemistry. Red arrows: Western blots. Black arrows:  
 184 immunohistochemistry. (B) Naturalistic sun- but not moonlight reduces L-Cry abundance. Head extracts sampled under  
 185 naturalistic sunlight (S), moonlight (M) and darkness (D) were analyzed by Western blot and normalized against beta-actin,  
 186 n=6 BRs. Bar graph: mean ± s.e.m. (C) Representative Western blot. (D-I) Wildtype worm heads sampled under indicated  
 187 naturalistic moon- or sunlight conditions, stained with an antibody against *Pdu*-L-Cry (green). (D'-I') and including nuclei  
 188 stained with HOECHST (violet). Scale bar: 5μm. For comparison to dark night conditions see fig. S3 and accompanying  
 189 manuscript Poehn, Krishnan et al.

190

191 These results indicate that L-Cry has the potential to signal in distinct cellular compartments to  
 192 discriminate between sun and moonlight valence. This is consistent with distinct functions of L-Cry in  
 193 mediating the differential impacts of sun- and moonlight on the PCC clock.



194 This hypothesis is further backed by biochemical data that show that naturalistic moonlight vs. sunlight  
195 results in different L-Cry photoreduction responses (see accompanying manuscript Poehn, Krishnan et  
196 al).

## 197 **Pharmaceutical disruption of canonical core circadian clock oscillations** 198 **affects the PCC clock**

199 We next wondered whether the PCC clock required the activity of the conventional core circadian  
200 clock. We previously showed that an inhibitor of the casein kinases  $1\delta/\epsilon$ , PF670462, disrupts the  
201 worms' core circadian clock gene oscillations (3). The effect of this drug on the core circadian clock has  
202 also been shown in several other aquatic animals, as diverse as cnidarian, crustacean and teleost fish  
203 species (11–13).

204 After validating that an incubation in 160nM of PF670462 abolished molecular oscillations of core  
205 circadian clock transcripts (fig. S4A), we assessed the effects of the drug on the timing of swarming  
206 onset. In contrast to mock-treated controls, the swarming onset in constant darkness was disrupted  
207 upon drug treatment (fig. S4B). This finding is consistent with the notion that at least a subset of  
208 canonical circadian clock genes is required for the PCC clock, although we can at present not rule out  
209 that this effect could be caused by other targets of casein kinases  $1\delta/\epsilon$ .

## 210 **dCry prevents the fly's circadian clock from misinterpreting moonlight**

211 As a regular nocturnal stimulus, moonlight reaches aquatic and terrestrial habitats. The ability to  
212 properly discriminate between moon- and sunlight is therefore likely important for any species that  
213 uses light-sensitive clocks. In many species, the conventional circadian clock should likely run with a  
214 constant period, irrespective of lunar phase. Thus, moonlight would need to be “blocked” from  
215 interfering with circadian rhythmicity in those organisms. Indeed, whereas fruit fly circadian behaviour  
216 can be experimentally entrained to LD cycles with light below full moon light intensity (14, 15), and  
217 constant light at moonlight intensity can extend the period length of wildtype flies (16, 17), moonlight  
218 does not cause major effects on the circadian clock when combined with a LD cycle in this species (18–  
219 21).

220 Given our results about the importance of *Platynereis* L-Cry in discriminating between naturalistic sun-  
221 versus moonlight, and *Drosophila* dCry being its direct 1:1 ortholog, we hypothesized that this in  
222 principle functionality of the d/L-Cry family might also be present in *Drosophila melanogaster*.  
223 Specifically, we wondered if nocturnal light mimicking moonlight would cause an increased shift of the  
224 circadian clock in dCry mutant flies compared to controls.

225 We monitored locomotor behaviour of both “cantonized” *cry<sup>01</sup>* (22) and CantonS wildtype flies under  
 226 LM conditions, adapting an existing locomotor paradigm (23), and using an artificial moonlight source  
 227 matching full moon light intensities measured on land (fig. S2D,E). In wildtype flies, moonlight delayed  
 228 the evening peak to  $2.2\text{h} \pm 0.13\text{h}$  (mean  $\pm$  s.e.m.) after night onset (Fig. 4A,C), in line with previous  
 229 observations (19), while *cry<sup>01</sup>* mutants exhibited a significantly stronger delay, with the evening activity  
 230 peak shifting to  $4.4\text{h} \pm 0.11\text{h}$  (mean  $\pm$  s.e.m.) after night onset (Fig. 4B, C).

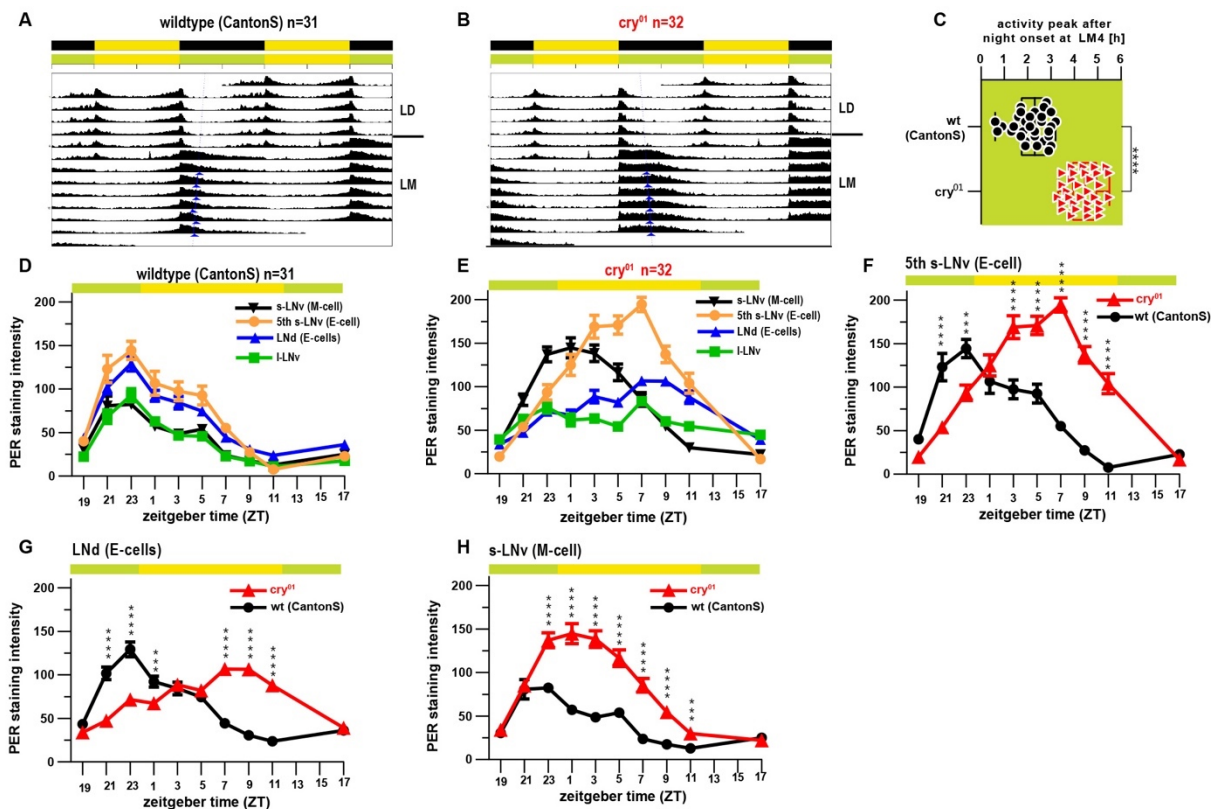

231

232 **Figure 4 | *Drosophila cry* protects circadian oscillator synchrony against moonlight.** (A,B) Double-plotted actograms  
 233 depicting average activity of wildtype (A) and *cry<sup>01</sup>* (B) flies subjected to 12:12h light:dark (LD) cycles followed by  
 234 light:moonlight (LM) cycles. Blue arrowheads indicate acrophases of the respective activity rhythms. (C) Timing of the E-peak  
 235 during LM4, calculated from the data shown in (A) and (B). The value 0 represents the time of lights off (D,E) Quantified anti-  
 236 PER immunolabeling intensity in different groups of lateral circadian clock neurons under LM conditions (LM4) in wild-type  
 237 (c) and *cry<sup>01</sup>* (d) individuals. (F,G) Detailed comparison of PER oscillations for neurons controlling evening activity, reveal a  
 238 pronounced phase delay of about ~8h in *cry<sup>01</sup>* mutants; (H) while neurons controlling morning activity show a more modest  
 239 phase delay (2h-4h). \*\*\* :  $p < 0.001$ ; \*\*\*\* :  $p < 0.001$  ANOVA followed by Sidak’s multiple comparison test.

240 The increased delay of the evening activity peak in *cry<sup>01</sup>* mutants could either be caused by acute effects  
 241 of artificial moonlight on behaviour or by a shift in the fly’s circadian clock. In order to discriminate  
 242 between these possibilities, we subjected flies to artificial LM conditions and used an established  
 243 immunolabeling strategy to systematically assess, over 10 distinct time points, changes in the  
 244 abundance of the core circadian clock protein Period (PER) in the lateral neurons harboring the fly’s  
 245 circadian pacemaker. Anatomical location and the presence or absence of immunoreactivity against  
 246 the neuropeptide PDF allowed us to quantify Period abundance in l-LN<sub>v</sub>s, s-LN<sub>v</sub>s (below also referred

247 to as morning/M-cells), as well as 5<sup>th</sup> s-LN<sub>v</sub>s and LN<sub>d</sub>s (clusters harboring the evening/E-cells) (Fig. 4D-  
248 H).

249 Quantification across 132 CantonS wildtype individuals exposed to LM conditions revealed that  
250 oscillations of Period protein levels in the different sub-clusters were in synchrony with each other (Fig.  
251 4D). In contrast, the corresponding *cry*<sup>01</sup> mutants exhibited pronounced desynchronization of Period  
252 protein oscillations between cell groups, with E-cells differing from M-cells by ~ 6h (Fig. 4E). Similar  
253 analyses of *cry*<sup>01</sup>-mutant flies raised in various LD cycles have not revealed such desynchronization (24),  
254 indicating that the effects we observed were specifically caused by exposure to artificial moonlight.  
255 When comparing Period protein abundances for the different cell classes between *cry*<sup>01</sup> mutants and  
256 wildtypes, Period levels in E-cells exhibited a stronger peak delay (~8h; Fig. 4F,G) than M-cells (~2h;  
257 Fig. 4H). This correlates with the fact that the peak of evening activity is significantly delayed in our  
258 behavioural analyses of *cry*<sup>01</sup> mutants compared to wildtypes under LM (Fig. 4A,B). Taken together,  
259 these results indicate that the increased delay of the evening activity peak in *cry*<sup>01</sup> mutants under a LM  
260 light regime is the result of a desynchronization of the circadian clock rather than an acute light effect.  
261 This suggests that *Drosophila* dCry is naturally required to reduce the effects of moonlight on circadian  
262 clock oscillations, in particular in the cell clusters harboring the evening oscillator.

## 263 L-Cry, but not dCry is highly sensitive to moonlight

264 Given the genetic requirement of both L-Cry and dCry to correctly interpret moonlight under a  
265 combined moonlight/sunlight regime, we next wondered if the biochemical light sensitivity of both  
266 orthologs was also comparable. For this we purified both proteins in the presence of their co-factor  
267 flavine adenine dinucleotide (FAD) and tested for changes in absorbance after illumination. When light  
268 is sensed by dCry (25) or L-Cry (accompanying paper), it changes the oxidized FAD to the reduced  
269 anionic radical FAD<sup>•-</sup> form, visible in the proteins' absorbance spectrum (25). Extending work of the  
270 accompanying manuscript, we find that *Platynereis* L-Cry does not only respond to naturalistic full  
271 moon light (see accompanying manuscript Poehn, Krishnan et al), but does this even at intensities  
272 corresponding to 30% of full moon intensity at 4-5m seawater depths (Fig. 5A).

273 In contrast, dCry completely failed to respond to naturalistic moonlight levels equivalent to – and  
274 exceeding – those eliciting responses in *Platynereis* L-Cry (compare Fig. 5A with B,C). However, dCry  
275 was activated by naturalistic sunlight, reaching complete FAD reduction within 20min (Fig. 5B) as  
276 observed for L-Cry (see accompanying paper), underscoring the integrity of the purified dCry protein  
277 and the functionality of the assay.

278

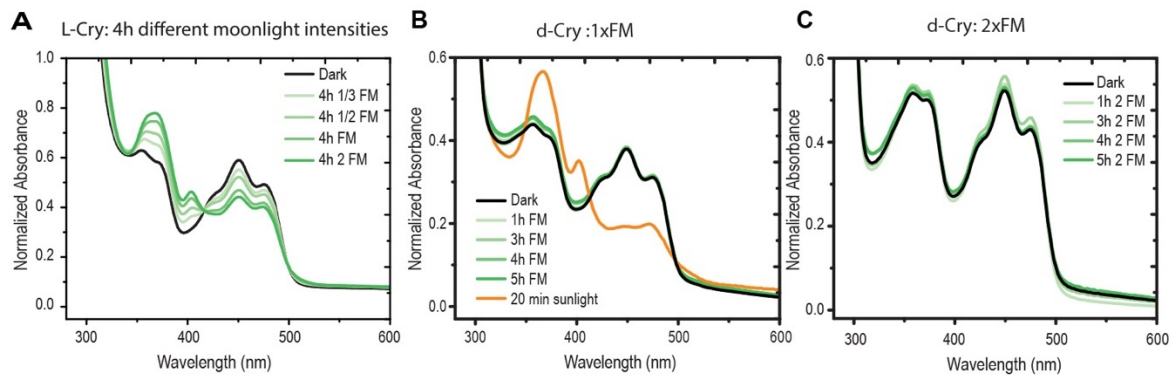

279

280 **Figure 5 | Comparison of L-Cry and dCry light detection.** Illumination of purified L-Cry protein with different moonlight  
281 intensities (green) for 4h results in photoreduction (FAD<sup>-</sup> formation). FM= full moon: naturalistic full moon intensity (9.7x10<sup>10</sup>  
282 photons/cm<sup>2</sup>/s), 1/3 FM: one third, 1/2 FM: one half, 2 FM: double of FM intensity. (B,C) dCry stimulation by moonlight (green)  
283 with naturalistic FM intensity (B) or double FM intensity (C) does not result in photoreduction, while naturalistic sunlight  
284 (yellow) does. For detailed analyses on Pdu-L-Cry responses to naturalistic sun and moonlight see accompanying manuscript  
285 Poehn, Krishnan et al.

286

287 Even though dCry's sensitivity to dim light might be higher in its cellular context (26), this result clearly  
288 points at differences in the molecular mechanisms between dCry and L-Cry functions. This might be  
289 well connected to the different meanings that moonlight has as an environmental cue for the daily  
290 behavior of flies versus swarming worms: Whereas fly circadian biology is likely optimized to buffer  
291 against the effect of moonlight, *Platynereis* worms, as shown above, use moonlight to precisely adjust  
292 their nocturnal swarming time to a favorable dark time window.

## 293 R-opsin1 detects moonrise to optimize the time of swarming onset

294 The retention of moonlight sensitivity in *Platynereis l-cry* mutants (as evidenced by the different  
295 mutant responses under the combined moon-and sunlight regimes versus no-moonlight regimes, Fig  
296 2D-G) indicated the existence of one or more additional light receptors required for moonlight  
297 sensation. We reasoned that the spectral sensitivity of these photoreceptors likely includes the blue-  
298 green range, given the relatively high levels of blue-green light in our moonlight measurements (fig.  
299 S2A).

300 The gene encoding r-Opisn1 is expressed in the adult *Platynereis* eyes both during early development  
301 (27, 28) and later stages (29). In a heterologous expression assay established for assessing  
302 photoreceptor action spectra (30), *Platynereis* r-Opisn1 exhibits an irradiance response peak in the  
303 blue range ( $\lambda_{max}$ = app. 470nm) (31), similar to the peak of its human melanopsin homolog. When we  
304 assessed the respective sensitivities of both receptors in side-by-side comparisons, the half-maximal  
305 effective irradiation (EI<sub>50</sub>) of *Platynereis* r-Opisn1 (2,3x10<sup>10</sup> photons cm<sup>-2</sup>s<sup>-1</sup>) was ~100 times lower than  
306 that of melanopsin (2,5x10<sup>12</sup> photons cm<sup>-2</sup> s<sup>-1</sup>; Fig 6A), indicating a remarkably high sensitivity of Pdu-  
307 r-Opisn1.

308 In the animal, this molecular sensitivity is combined with a high abundance of r-Opisin1: On the  
 309 transcript level, a cellular profiling analysis revealed that *r-opsin1* is one of the topmost expressed  
 310 genes in *Platynereis* adult eye photoreceptors, outnumbering a distinct co-expressed opsin – *r-opsin3* –  
 311 by nearly three orders of magnitude (31). Moreover, in the course of the metamorphic changes that  
 312 occurs during the days immediately prior to swarming, the outer segments of the eye photoreceptors –  
 313 where Opsin molecules are concentrated in tightly packed membrane stacks – extend to around twice  
 314 their length, suggesting an even increased sensitivity (32). All these facts infer that r-Opisin1 acts as a  
 315 particularly high-sensitive light detector at the time of swarming.

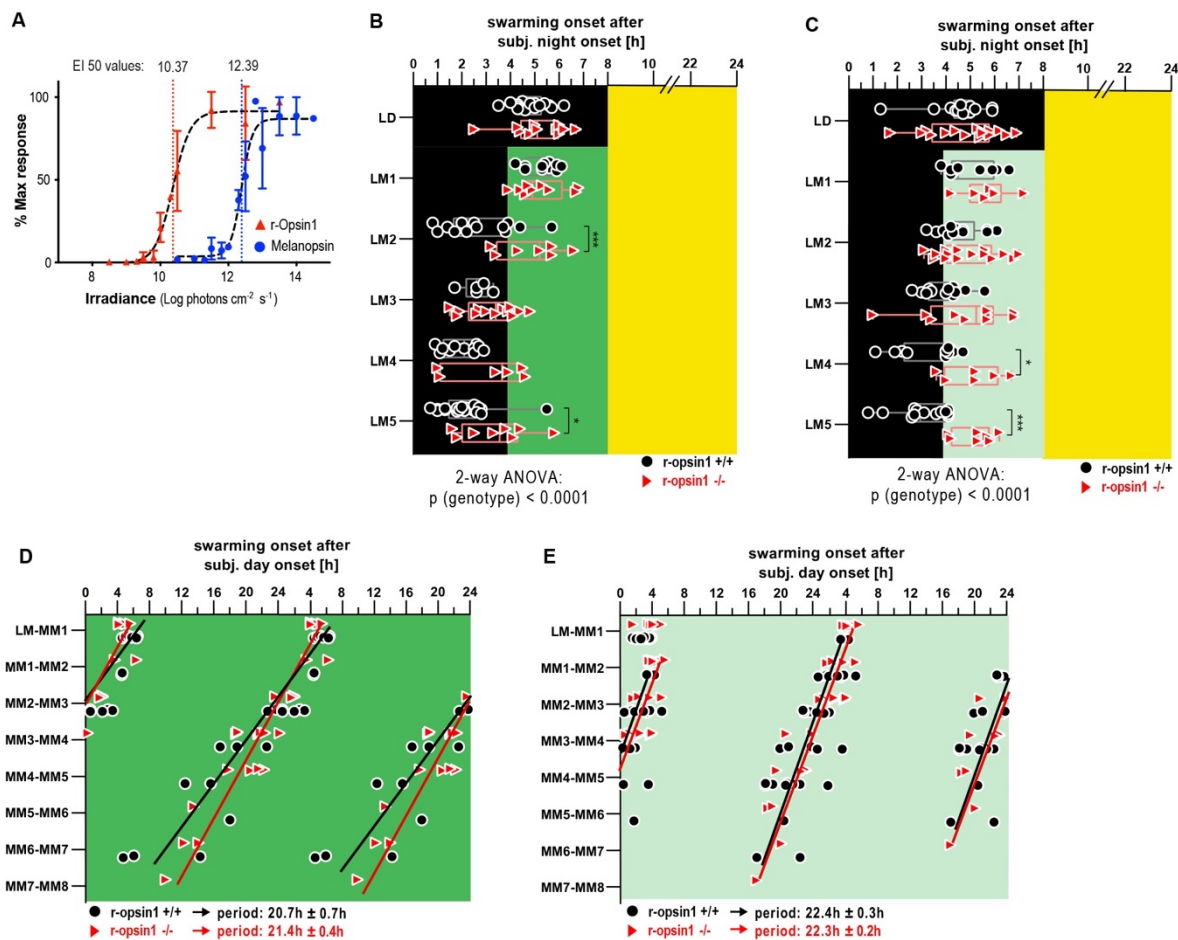

316

317 **Figure 6 | *Pdu-r-Opisin1* functions as highly light-sensitive photoreceptor to adjust swarming onset under a waning moon**  
 318 **light timing.** (A) Responses of *Pdu-r-Opisin1* (red) and human Melanopsin (blue) to different blue light intensities (480nm ±  
 319 10nm) as quantified by a cell-based bioluminescent assay, reveal an ~100-fold higher sensitivity of *Pdu-r-Opisin1*. (B-E)  
 320 Swarming onset of *r-opsin1*<sup>-/-</sup> and *r-opsin1*<sup>+/+</sup> worms entrained to 16:8h LD cycles and then subjected to a moon light regime  
 321 typical for waning moon, i.e. moonlight during the second half of the night (LM) (B,C) or to constant moonlight (D,E) either  
 322 with full moon light intensity (dark green) (B,D) or waning moon light intensity (light green = 20 % of full moon light intensity)  
 323 (C,E). \* : p<0.05; \*\* : p<0.001; \*\*\* : p<0.0001 2-way ANOVA followed by Sidak's multiple comparison test. Black and red lines  
 324 in (D,E) indicate linear regression lines of wildtype and *r-opsin1*<sup>-/-</sup> mutants, respectively. The period length was calculated  
 325 based on the slope of the regression line (from MM1-MM8) ± the 95% CI of the slope.

326 To test whether r-Opisin1 was indeed required to mediate the impact of moonlight on the timing of  
 327 swarming onset, we capitalized on an existing *r-opsin1*<sup>-17/-17</sup> loss-of-function allele (31). Following the  
 328 experimental design of Fig. 1E, we subjected homozygous *r-opsin1*<sup>-17/-17</sup> mutants and related wildtype

329 individuals for 5 days to naturalistic moonlight during the second half of the night (Fig. 6B). *r-opsin1*<sup>-/-</sup>  
 330 animals exhibited a significantly reduced ability to shift their swarming onset to the dark portion of the  
 331 night compared to wildtypes (Fig. 6B). This difference became even stronger with naturalistic  
 332 moonlight at lower intensities (as this would be the case for the natural waning moon) (Fig. 6C). Finally,  
 333 we wondered if *r-opsin1* mutants would also exhibit a reduced ability to reset the PCC under constant  
 334 moonlight. Under constant moonlight at naturalistic full moon (Fig.6D) or waning moon (Fig.6E) light  
 335 intensities, *r-opsin1* mutants were indistinguishable from wildtype. Comparing these results with those  
 336 obtained with the *l-cry*<sup>-/-</sup> mutants (Fig.2B) let us conclude that *r-opsin1* specifically enables the worms  
 337 to detect the rise of the moon to align the PCC accordingly.

338 Taken together, our data argue for two distinct roles of L-Cry and r-Opisn1 in decoding naturalistic  
 339 moonlight and adjusting the PCC (Fig. 7): L-Cry, with its biochemically distinct “moonlight-state”, yet  
 340 slow activation kinetics *in vitro* (see Poehn, Krishnan et al), is able to shorten the period of the PCC  
 341 under sustained moonlight conditions, as they occur around natural “full moon” phases (Fig.7A). In  
 342 turn, r-Opisn sensitivity, response kinetics and abundance in the eye photoreceptors make it suited to  
 343 detect even weak, acute dim light, as caused by the rising moon in a “waning moon” phase, and  
 344 advance the PCC (Fig. 7B). We hypothesize that the distinct nuclear localization of L-Cry in eye  
 345 photoreceptors even in moonlit nights (Fig. 3) provides the necessary distinction (night/day) for  
 346 activated eye photoreceptors to decode the specific valence of such nocturnal light stimuli (Fig. 7).

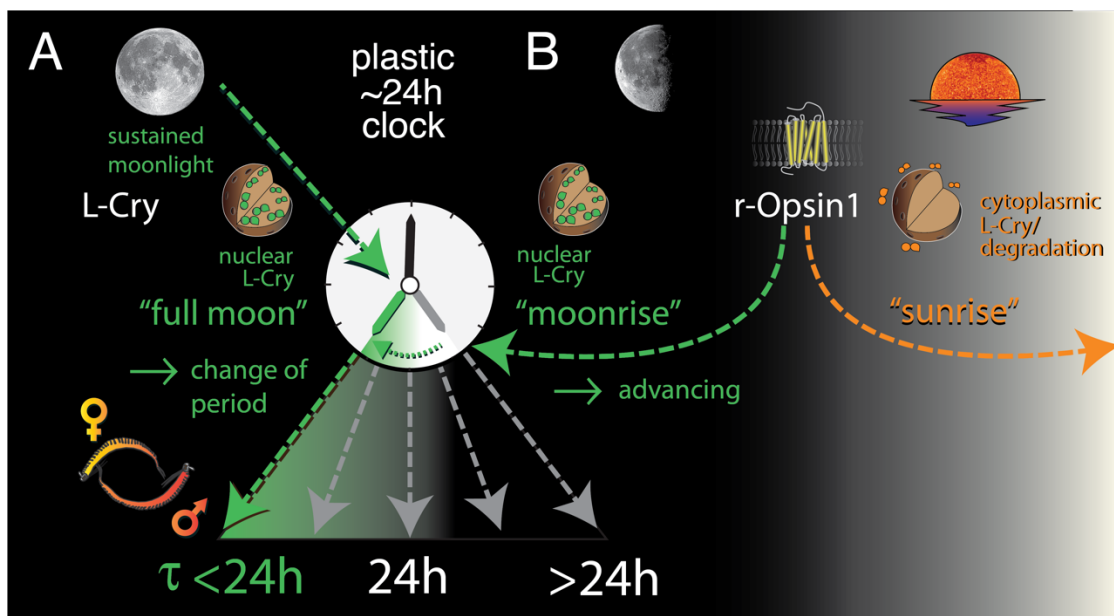

347 **Figure 7 | Schematic model of how the combinatorial responses of L-Cry and r-Opisn1 to naturalistic moonlight**  
 348 **can adjust the PCC to schedule reproductive behaviour to dark portions of the night. (A)** Sensation of sustained  
 349 moonlight (“full moon”) requires L-Cryochrome (L-Cry) and shortens the period length ( $\tau$ ) of the PCC. **(B)** r-  
 350 Opisn1 is required to sense acute dim nocturnal light, as generated by the moonrise during the waning moon  
 351 phase, and advances the PCC; correct interpretation of such acute dim nocturnal light (i.e. “moonrise” vs.  
 352 “sunrise”) requires L-Cry, a function likely tied to the distinct subcellular localisation of L-Cry during night and  
 353 day. Functions of sunlight in adjusting the PCC are not part of this scheme.

## 354 Discussion

355 Here we uncover a ~24hr endogenous oscillator in marine broadcast-spawning worms that exhibits  
356 marked, moonlight-dependent plasticity in its period length. Its modulation by naturalistic moonlight  
357 provides a plausible model for how worms synchronize their nuptial dance, targeting a specific hour  
358 during the dark portion of moonlit nights. Restricting swarming behaviour to the dark portion of the  
359 night might be advantageous to avoid predators that hunt during moonlight. On a mechanistic level  
360 we suggest that this PCC clock shares elements with the conventional core circadian oscillator and  
361 reveal two highly sensitive light receptors, r-Opn1 and L-Cry, that are critical to sense and interpret  
362 naturalistic moonlight.

363 Sensitivity to moonlight is directly relevant for a broad panel of marine broadcast spawners. The  
364 challenge of “tagging” nocturnal light information with the correct valence, however, likely extends  
365 beyond this specific ecological context. The classical categorization of organisms into nocturnal versus  
366 diurnal species (33, 34) typically neglects the aspect of moonlight. Any animal entraining its ~24hr clock  
367 to light will need to correctly interpret the occurrence of nocturnal light. Even though it has been  
368 shown that the circadian system of many species is sensitive to light levels as low as moonlight  
369 intensity, such as in flies (14, 15) and mice (35), chronobiological studies have so far put relatively little  
370 effort in dissecting how animal clocks prevent potential disturbance of moonlight, and interpret  
371 naturalistic light regimes that combine both sun- and moonlight.

372 The data presented in this and the accompanying manuscript provide possible mechanistic  
373 explanations for the ability of the PCC clock to decode a combined sun and moon light regime. A first  
374 tier is connected to the specific properties of cryptochrome: While under naturalistic moonlight,  
375 *Platynereis* L-Cry protein levels remain elevated, comparable to dark conditions, and are  
376 predominantly localized to the nucleus, the onset of sunlight causes a rapid degradation, with residual  
377 L-Cry protein found in the cytoplasm. On the biochemical level, L-Cry is highly sensitive to naturalistic  
378 moonlight. Moonlight evokes a different state in L-Cry than sunlight (see extensive comparison of  
379 sunlight vs. moonlight in Poehn, Krishnan et al). Taken together, these data are consistent with the  
380 idea that – besides the canonical strong-light induced degradation-based signaling pathway for  
381 cytoplasmic Cryptochrome – L-Cry possesses a second, dim-light induced, nuclear mode of signaling. A  
382 second lead is provided by our identification of r-Opn1 as a second moonlight sensor. It remains to  
383 be uncovered, however, how the r-Opn1-dependent signals tie in with the different signaling states  
384 of L-Cry.

385 Evidence for plasticity of the conventional circadian clock has started to emerge from other marine  
386 systems: Work on the circatidal oscillators of oysters maintained under controlled lab conditions  
387 revealed that core circadian clock genes exhibit ~12.4hr cycles under constant darkness, while the

388 transcripts of the same genes cycle with a ~24hr oscillation under light/dark conditions (36). This  
389 provides evidence for the ability of the canonical clock to alternate between circadian (~24h) and  
390 (semi)circalunidian (~12.4h/~24.8h) periodicities. Interestingly, switches between circadian and  
391 circalunidian cycles might also occur in humans. It was shown that mood switches of bipolar patients  
392 correlate with a period lengthening of their body temperature cycles that looks as if the circadian  
393 timing system can be intermittently entrained to a 24.8h rhythm (37). While such observations in  
394 human remain highly enigmatic, we anticipate that research on organisms for which lunar impact is of  
395 known biological relevance will be key to disentangle the interplay of solar and lunar timing cues.

## 396 Material and Methods

397

### 398 Worm culture

399 Worms were grown as described previously (38). In short: worms were kept in plastic boxes filled with  
400 a 1:1 mixture of natural sea water and artificial sea water (30% Tropic Marine) and exposed to a 16h :  
401 8h light:dark light regime. To entrain their circalunar clock, worms receive 8 nights of continuous  
402 nocturnal light each month to mimic full moon (FM).

403 Strains: *l-cry*<sup>-/-</sup>: homozygous  $\Delta 34$ , generated in the VIO-strain background (see accompanying  
404 manuscript Poehn, Krishnan et al.). Wildtype worms used for comparison to *l-cry*<sup>-/-</sup> worms are cousin  
405 relatives to *l-cry*<sup>-/-</sup> worms.

406 *r-opsin1*<sup>-/-</sup>: homozygous  $\Delta 17$ , generated in the *r-opsin1::GFP* transgenic strain (31). Wildtype worms used  
407 for comparison are from the *r-opsin1::GFP* transgenic strain from which the mutant was generated.

408

### 409 Natural light measurements

410 Under water measurements of natural sun- and moonlight at the habitat of *Platynereis* were acquired  
411 using a RAMSES-ACC-VIS hyperspectral radiometer (TriOS GmbH) for UV to IR spectral range (see (7)  
412 for details). Radiometers were placed at 4m and 5m water depth close to *Posidonia oceanica* meadows,  
413 which are a natural habitat for *P. dumerilii*. Measurements were recorded automatically every 15min  
414 across several weeks in the winter 2011/2012 (at 5m depth) and during spring 2011 (at a 4m depth).  
415 To obtain an exemplary sunlight spectrum, the sunlight measurements taken at 5m depth between 10  
416 am-4 pm on 25.11.2011 we averaged. To obtain a full moon spectrum for the 5m depth location  
417 measurements taken from 10pm to 1am on a clear full moon night (10-11.11.2011) were averaged. To  
418 control for technical noise caused by the measurement device at these low light intensities, a NM  
419 spectrum was obtained by averaging measurements between 7:15pm to 5am on a NM night on  
420 24.11.2011, and subtracted from the FM spectrum. The resulting spectrum is plotted in fig S2A. To  
421 validate that this spectrum is representative of a typical full moon spectrum at the habitat of  
422 *Platynereis*, we averaged moonlight measured between 10:15 pm to 2am during a full moon night (17.-



423 18.04.2012) and subtracted a NM spectrum measured two weeks earlier from 4m depth (fig. S2A). To  
424 benchmark these moonlight spectra measured under water with moonlight measured on land, we  
425 compared the underwater spectra to a publicly available full moon spectrum measured on land on  
426 14.04.2014 in the Netherlands (fig.S2A, [http://www.olino.org/blog/us/articles/2015/10/05/spectrum-](http://www.olino.org/blog/us/articles/2015/10/05/spectrum-of-moon-light)  
427 [of-moon-light](http://www.olino.org/blog/us/articles/2015/10/05/spectrum-of-moon-light)). As expected, light with longer wavelengths was strongly reduced in the underwater  
428 measurements compared to the surface spectrum, since light with longer wavelengths penetrates  
429 water less efficiently.

430

### 431 **Behavioural setup and analyses of swarming onset**

432 All behavioural experiments, except Fig. 1B and Fig. 2F,G were performed with worms that received  
433 LD conditions without any nocturnal light (FM) for at least 9 days. Since most *l-cry* mutants spawn  
434 during the first 9 nights after the FM stimulus under standard worm culture conditions (Poehn et al),  
435 the monthly FM stimulus was omitted for *l-cry* mutants and wildtypes in order to test swarming worms  
436 without confounding effect of a recent nocturnal (highly artificial) light stimulus on swarming onset.

437 Sexually maturing worms were placed in seawater filled individual hemispherical concave wells  
438 (diameter = 35mm, depth = 15mm) of a custom-made 36-well clear plastic plate. Video recording of  
439 worm's behavior over several days was accomplished as described previously (3), using an infrared ( $\lambda$   
440 = 990 nm) LED array (Roschwege GmbH) illuminating the behavioral chamber and an infrared high-  
441 pass filter restricting the video camera. Worms were recorded at least until initiation of swarming  
442 (fig.S1A). Naturalistic sun- and moonlight were generated by custom made LEDs (Marine Breeding  
443 Systems, St. Gallen, Switzerland) (for spectra and intensity see fig. S2B,E). Naturalistic sun- and  
444 moonlight were used in all worm experiments, except for data obtained in Fig. 1B and Fig. 2E,F,G were  
445 we used prototype artificial sun- and moonlight LEDs (fig. S2C).

446 Spectra were measured with a calibrated ILT950 spectrometer (International Light Technologies Inc.,  
447 Peabody, USA). To reliably measure the artificial moonlight, the detector was placed 12cm away from  
448 the moonlight source, and based on this measurement moonlight intensity was calculated using the  
449 inverse square law for worm position, which was  $\sim 51$  cm away from the moonlight source.

450 After video recording, an automated tracking software was used to deduce locomotor activity of  
451 individual worms across the time of the recording (7). The exported locomotor activity trajectories,  
452 which reflect the distance moved of each worm's center point across 6 min time bins, were analyzed  
453 in ActogramJ to manually identify the swarming onset moment. In ambiguous cases (e.g. only little  
454 movement detected) we manually analyzed the video recordings to identify the moment when a  
455 sexually mature worm left its tube, which was regarded as swarming onset. Swarming onset data were  
456 plotted and analyzed using GraphPad Prism 8.0 (La Jolla, USA). ANOVA was used to test if swarming  
457 onset was statistically different across the different days of an experiment. This was followed by

458 Dunnetts multiple comparison test, comparing each day of the experiment with swarming onset during  
459 LD conditions. To test differences in swarming onset between mutants and wildtypes across different  
460 days of an experiment with varying light conditions, 2-way ANOVA was used followed by Sidak's  
461 multiple comparison test. To identify the free-running periodicity under constant light conditions linear  
462 regression analysis was performed. The period length was calculated based on the slope of the  
463 regression line  $\pm$  the 95% CI of the slope. Swarming onset data are presented including the individual  
464 data points and a box plot. The whiskers of the box blot represent minimal and maximal values.

465

#### 466 **Recording of locomotor activity in *Drosophila melanogaster***

467 Locomotor activity was recorded under constant temperature (20°C) from 0-1 day old male Canton-S  
468 and *cry*<sup>01</sup> (CantonS background) flies using the *Drosophila* Activity Monitors from Trikinetics  
469 Incorporation (Waltham, MA, USA)(23). Flies were first recorded for 5 days under 12h light - 12h dark  
470 cycles (=LD with ~100 lx standard white light LED), and then under for 7 days under 12h light – 12h  
471 artificial moonlight cycles (=LM cycles; for spectrum and intensity of artificial moonlight see fig.S2C).  
472 The average actograms and the centers of maximal activity were calculated and plotted with  
473 ActogramJ(39). The phases of evening activity maxima under LM conditions were determined using  
474 the ActogramJ tool “acrophase”. To test for differences in the acrophase of wildtype and *cry*<sup>01</sup> flies at  
475 LM4, an unpaired student-test was performed.

476

#### 477 **Western blots**

478 Four anaesthetized worms were decapitated and heads transferred to a 1.5ml tube containing 150  $\mu$ l  
479 RIPA lysis buffer (R0278 Sigma-Aldrich) supplemented with 10% Triton X100 and protease inhibitor  
480 (cOmplete Tablets, EDTA-free, EASYpack, Roche) per biological replicate. The tissue was homogenized  
481 by grinding using a tightly fitting pestle. All steps on ice. Cell debris was pelleted by centrifugation.  
482 Protein concentration of lysates was determined using Bradford reagent (BIORAD). Proteins were  
483 separated by SDS-gel electrophoresis (10% Acrylamide) and transferred to nitrocellulose membrane  
484 (Amersham™ Protran™ 0,45 $\mu$ m NC, GE Healthcare Lifescience). Quality of transfer was confirmed by  
485 staining with Ponceau-S solution (Sigma Aldrich). After 1h of blocking with 5% skim milk powder  
486 (Fixmilch Instant, MARESI) in 1xPTW (1xPBS/0.1% TWEEN 20) at room temperature, the membrane  
487 was incubated with the appropriate primary antibody, diluted in 2.5% milk/PTW at 4°C O/N. [anti-L-  
488 Cry 5E3-3E6-E8 (1:100) and anti-L-Cry 4D4-3E12-E7 (1:100); anti-beta-Actin (Sigma, A-2066, 1: 20.000)].  
489 After 3 rinses with 1xPTW the membrane was incubated with the species specific secondary antibody  
490 [anti-Mouse IgG-Peroxidase antibody, (Sigma, A4416, 1:7500); Anti-rabbit IgG-HRP-linked antibody  
491 (Cell Signaling Technology, #7074, 1:7.500] diluted in 1xPTW/1% skim milk powder for 1 hour. After  
492 washing, SuperSignal™ West Femto Maximum Sensitivity Substrate kit (Thermo Fisher Scientific) was

493 used for HRP-signal detection and finally signals were visualized by ChemiDoc Imaging System  
494 (BIORAD). Bands were quantified in “Image Lab 6.1” (BIORAD)

495

#### 496 **Immunohistochemistry**

497 Portions of *Platynereis dumerilii* bodies containing head and jaw were dissected and fixed in 4% PFA at  
498 4° C for 24 h. Afterwards, methanol washes at room temperature (r.t., shaking) and a 5-minutes long  
499 digestion using Proteinase K (r.t., not shaking) were employed as means of permeabilization. The worm  
500 heads and jaws were then post-fixed with 4% PFA for 20 min at r.t. and washed using 1x PTW (PBS-  
501 0.1% Tween 20® (Sigma Aldrich)) 5 times for 5 min. This was followed by over-night incubation in a  
502 hybridization mixture(40), commonly used for in situ hybridization (at 65° C in water bath; the solution  
503 exchanged once, after the first hour of incubation). Several washing steps were performed the  
504 following day, at 65° C in a thermo-block, not shaking (washing sequence, solutions and durations: a.  
505 2 times 20 min with 50% formamide/2X standard saline citrate - 0.1% Tween 20® (Sigma Aldrich), SSCT;  
506 b. 2 times 10 min with 2X SSCT; c. 2 times 20 min with 0.2X SSCT). Samples were subsequently blocked  
507 using 5% sheep serum (Sigma-Aldrich) (r.t., 90 min, shaking) and incubated for at least 36 h (4° C,  
508 shaking) in a mixture of two monoclonal antibodies against L-Cry, 5E3-3E6-E8 and 4D4-3E12-E7 (1:100  
509 and 1:50, correspondingly, in 5% sheep serum (Sigma-Aldrich)) (see accompanying manuscript for  
510 further details). Next, samples were washed with 1x PTW 3 times for 15 min (r.t., shaking) and a 1 time  
511 over night (4° C, shaking). A Cy3 goat anti-mouse IgG secondary antibody (A10521, Thermo Fisher  
512 Scientific) was added in dilution 1:400 in 2.5% sheep serum to specifically detect the bound primary  
513 antibody (incubation time and conditions, as well as the following washing steps, were the same as  
514 those of the primary antibody). To label nuclei, samples were incubated for 30 min in Höchst 33342  
515 (H3570, Thermo Fisher Scientific), diluted 1:2000 (r.t., shaking), washed 3 times for 15 min using 1x  
516 PTW and mounted in 87% glycerol (Sigma-Aldrich)/ddH<sub>2</sub>O containing 25 mg/ml DABCO (Roth/Lactan).  
517 All solutions were made using 1x PTW unless stated otherwise.

518 Imaging of the worm heads was done using a Zeiss LSM 700 laser scanning confocal microscope and  
519 LD LCI Plan-Apochromat 25X and Plan-Apochromat 40X by CHD objectives, T-PMT detection system  
520 and Zeiss ZEN 2012 software (lasers used: DAPI 405 nm and Cy3 555 nm). Image analysis was  
521 performed using the software Fiji/ImageJ (41).

#### 522 **Period oscillations in *Drosophila* clock neurons**

523 To compare the effect of moonlight between cry mutants and wildtypes on the Period oscillations in  
524 the different clock neuron clusters we entrained 0-1 day old male Canton-S and *cry01* (CantonS  
525 background) flies first under 12h light - 12h dark cycles (~100 lx standard white light LED), and then  
526 subjected them to artificial moonlight during the night (=LM cycles; for spectrum fig.S2C) for another  
527 4 days. At LM4 whole flies were fixed at the indicated ZTs (for 3h) with 4% PFA + 0.1% TritonX100. Flies

528 were then washed 3x10min in PBT 0.5% and their brains were dissected. Subsequently, brains were  
529 blocked with 5% NGS in PBT 0.5% for 3 hours. Brains were incubated for 48h at 4°C with the following  
530 primary antibodies diluted in PBT 0.5% + 5% NGS: rabbit anti-PER (1:1000), mouse anti-Pdf (1:1000).  
531 The secondary antibodies were goat anti-rabbit Alexa™ fluor 488 (1:200) and goat anti-mouse Alexa™  
532 635 (1:200) incubated at 4°C overnight. Before mounting, brains were washed 6x with PBT 0.5% (last  
533 wash with PBT 0.1%) and then mounted in Vectashield H-1000. Images were acquired with TCS SPE  
534 Leica confocal microscope using a 20-fold glycerol immersion objective (Leica Mikrosystems, Wetzlar,  
535 Germany) and analyzed with ImageJ as described in ref. (42). PER staining intensity in the different  
536 pacemaker cell groups was examined in 12-15 brains (one hemisphere per brain) per timepoint and  
537 genotype. To obtain PER staining intensity above background for of each cell group, the PER signal of  
538 all cells of a cell group in one hemisphere was averaged and background signal measured near this cell  
539 group was subtracted. In case not all cells of a specific cell group could be identified, these missing cells  
540 were ignored for analysis.

541 Finally, to obtain an average staining intensity per cell group, the corresponding staining intensities of  
542 all 12-15 brain hemispheres sampled during one timepoints were averaged.

543

#### 544 **Opsin spectral sensitivity comparison**

545 To investigate the spectral sensitivity comparison of Pdu r-opsin1 to human melanopsin, mammalian  
546 expression vectors for both opsins were independently co-transfected into HEK293 cells along with an  
547 expression vector containing the luminescent calcium sensitive protein, Aequorin (pcDNA5/FRT/TO  
548 mtAeq) using Lipofectamine 2000 to access the activation of Gαq signaling as shown in previously  
549 published work (Roger publication, Bailes et al). After 6hrs incubation, the medium was changed to  
550 DMEM containing 10% FBS and 10uM 9-cis retinal, after which point the cells were protected from  
551 light. The following day, medium was changed to L-15 without phenol red, containing 10uM  
552 Coelentrazine-h and 10uM 9-cis retinal. Individual wells were briefly exposed to a 2s flash of near  
553 monochromatic light (480nm +/- 10nm) produced from an Xenon arc lamp and delivered via a fiber-  
554 optic cable fixed ~10cm above the relevant well and accessed for increase in calcium level by measuring  
555 the raw luminescence (RLU) signal with a resolution of 0.5s and cycle of 2s. Luminescence was read  
556 using a Clariostar (BMG labtech). Light intensity was modified using combinations of 0.9, 0.2 and 0.1  
557 Neutral density filters. RLU measured during dark incubation preceding the light pulse were used as  
558 baseline. Maximum response was determined by the peak luminescence value post light flash,  
559 normalised to the maximum luminescence value recorded, per opsin, for that experiment. The  
560 resultant maximal response value acquired from each replicate were plotted against the irradiance  
561 measured for tested wavelength. This irradiance response curve was then fitted with a sigmoidal dose  
562 response function to understand the maximum sensitivity of both opsins.

563

#### 564 **Casein kinase inhibitor treatment and qPCRs**

565 Worms were treated with indicated concentrations of PF-670462 for 3 days under LD conditions during  
566 new moon. For sampling, worms were first anaesthetized for ca. 10min with a 1:1 mixture of seawater  
567 and 7.5% (w/v) MgCl<sub>2</sub> solution. The head was then cut behind the posterior eyes with a scalpel at the  
568 indicated timepoints. Five heads were pooled per biological replicate, immediately frozen in liquid  
569 nitrogen and stored at -80°C until RNA extraction.

570 For RNA extraction, 350µl of RNAzol RT (Sigma-Aldrich) were added to the samples and lysis was  
571 performed with TissueLyser II (Qiagen) at 30Hz for 2min. Afterwards, RNA was extracted using Direct-  
572 zol RNA Miniprep kit (Zymo Research) following the manufacturer's instructions with additional on-  
573 column DNaseI digest. RNA was eluted in 34µl of nuclease-free water.

574 Total RNA (300ng per sample) was reverse transcribed using QuantiTect Reverse Transcription Kit  
575 (Qiagen). The resulting cDNA was diluted to a volume of 60µl. qPCR reactions were performed in 20µl  
576 total volume with Luna Universal qPCR Master Mix (New England Biolabs). Target genes and reference  
577 controls were analysed in duplicate reactions for all samples. Plate control cDNA and -RT controls were  
578 included on each plate. *cdc5* was used as reference gene(3). Expression levels were calculated using  
579 the  $\Delta\text{ct}$  method. Relative expression values were calculated with the formula: relative expression =  $2^{-\Delta\text{ct}}$ .  
580

581

#### 582 **Recombinant expression and purification of L-Cry and dCry proteins**

583 L-Cry was expressed and purified from insect cells as described in the accompanying manuscript  
584 (Poehn/Krishnan et al). N-terminally His<sub>6</sub>-tagged dCry was expressed in *Spodoptera frugiperda* (*Sf9*)  
585 insect cells using a pFastBac HTb expression vector (Berndt et al, 2007). 1 L of  $1 \times 10^6$  *Sf9* cells/ml in  
586 sf900II media were transfected with P1 virus stock and incubated at 27°C for 72 h. Harvested cell pellets  
587 were resuspended in lysis buffer (25 mM Tris pH 8.0, 300 mM NaCl, 20 mM imidazole, 5% glycerol, 5  
588 mM  $\beta$ -mercaptoethanol) and lysed by sonication. The lysate was centrifuged and the clarified  
589 supernatant loaded onto a 5ml HisTrap HP nickel affinity column (GE Healthcare). dCry protein was  
590 eluted with 100 mM imidazole, diluted with low salt buffer (50 mM Tris pH 8.0, 5% glycerol, 1mM DTT)  
591 and loaded onto a 5 ml DEAE sepharose anion exchange column (GE Healthcare). After gradient elution  
592 (0 to 500 mM NaCl), dCry containing fractions were concentrated and loaded onto a HiLoad S200 16/60  
593 size exclusion chromatography (SEC) column (buffer 25 mM Tris pH 8.0, 150 mM NaCl, 5% glycerol, 1  
594 mM TCEP). SEC fractions containing pure dCry protein were pooled, concentrated and stored at -80°C  
595 until further use. All purification steps were carried out in dark- or dim red light conditions.

596

#### 597 **UV/VIS spectroscopy of L-Cry and dCry**

598 UV/VIS absorption spectra of purified L-Cry and dCry proteins were recorded on a Tecan Spark 20M  
599 plate reader. An intensity calibrated naturalistic moonlight source (fig.S2C) was used for moonlight  
600 UV/VIS spectroscopy on L-Cry and dCry. Naturalistic full moon (FM) intensity was set to  $9.67 \times 10^{10}$   
601 photons  $\text{cm}^{-2}\text{s}^{-1}$ . To analyze moonlight dose-dependent FAD photoreduction of L-Cry, dark-adapted L-  
602 Cry was illuminated with different moonlight intensities (1/3 FM, 1/2 FM, FM and 2 FM intensity)  
603 continuously for 4 h on ice and UV-VIS spectra (300 – 700 nm) were collected after 4 h. To analyze  
604 sunlight- and moonlight dependent FAD photoreduction of dCry, dark-adapted dCry (kept on ice) was  
605 continuously illuminated with naturalistic sunlight ( $1.55 \times 10^{15}$  photons  $\text{cm}^{-2} \text{s}^{-1}$  at the sample) or  
606 naturalistic moonlight ( $9.67 \times 10^{10}$  photons  $\text{cm}^{-2} \text{s}^{-1}$  at the sample) and UV-VIS spectra (300 – 700 nm)  
607 were collected at different time points.

608

### 609 **Statistical analyses**

610 We used one-way ANOVA followed by Dunnett's test to test if the timing of swarming onset during LD  
611 conditions differs compared to conditions where worms are subjected to moonlight conditions on top  
612 of a LD cycle. We used two-way ANOVA followed by Sidak's test to test if and during which days the  
613 timing of swarming onset differs between mutant and wildtypes across different days of a behavioural  
614 experiment. To compare if two sets of data had different variances, a F-test as part of t-test statistics  
615 was performed. Swarming onset data are shown as individual data points, and additionally represented  
616 as box plots with whiskers reaching to the maximal and minimal value.

617 Western blot data, which assessed head L-Cry levels during sunlight, moonlight and darkness  
618 conditions were analyzed with one-way ANOVA followed by Tukey's multiple comparison test to test  
619 for significant differences in L-Cry abundance between the different light conditions.

620 To compare period oscillation in the different cell groups between *cry01* mutants and wildtype flies  
621 over different ZTs we used two-way ANOVA followed by Sidak's test.

622

### 623 **Acknowledgements**

624 We thank the members of the Tessmar-Raible, Raible, Helfrich-Förster and Wolf groups for discussions.  
625 Andrej Belokurov and Margaryta Borysova for excellent worm care at the MFPL aquatic facility. We are  
626 grateful for support by the IMB Protein Production and Proteomics Core Facilities (instrument funded  
627 by DFG INST 247/766-1 FUGG).

628 Funding: K.T.R. received funding for this research from the European Research Council under the  
629 European Community's Seventh Framework Programme (FP7/2007–2013) ERC Grant Agreement  
630 337011 and the Horizon 2020 Programme ERC Grant Agreement 819952, the research platform  
631 'Rhythms of Life' of the University of Vienna, the Austrian Science Fund (FWF,  
632 <http://www.fwf.ac.at/en/>): SFB F78 and the HFSP (<http://www.hfsp.org/>) research grant

633 (#RGY0082/2010). S.K. is a recipient of a DFG fellowship through the Excellence Initiative by the  
634 Graduate School Materials Science in Mainz (GSC 266). C.H-F. was funded by Deutsche  
635 Forschungsgemeinschaft (DFG), collaborative research center SFB 1047 “Insect timing,” Project A1 and  
636 A2. None of the funding bodies was involved in the design of the study, the collection, analysis, and  
637 interpretation of data or in writing the manuscript. RJL received support from the HFSP (project grant  
638 RGP0034/2014).

639  
640

## 641 References

- 642 1. S. Ranzi, *Pubbl. del Stn. Zool. Napoli*. **11**, 271–292 (1931).
- 643 2. C. Hauenschild, *Cold Spring Harb. Symp. Quant. Biol.* **25**, 491–497 (1960).
- 644 3. J. Zantke *et al.*, *Cell Rep.* **5**, 99–113 (2013).
- 645 4. H. Caspers, *Mar. Biol.* **79**, 229–236 (1984).
- 646 5. G. R. Gaston, J. Hall, *Gulf Caribb. Res.* **12**, 47–51 (2000).
- 647 6. J. Zantke, S. Bannister, V. B. V. Rajan, F. Raible, K. Tessmar-Raible, *Genetics*. **197**, 19–31 (2014).
- 648 7. V. B. Veedin Rajan *et al.*, *Nat. Ecol. Evol.* **5**, 204–218 (2021).
- 649 8. M. van der Steen, Spectrum of moon light, (available at  
650 <http://www.olino.org/blog/us/articles/2015/10/05/spectrum-of-moon-light>).
- 651 9. O. Levy *et al.*, *Science*. **318**, 467–470 (2007).
- 652 10. L. E. Foley, P. Emery, *J. Biol. Rhythms* (2019), doi:10.1177/0748730419878290.
- 653 11. L. Zhang *et al.*, *Curr. Biol.* **23**, 1863–1873 (2013).
- 654 12. S. S. Storz *et al.*, *PLoS One*. **8** (2013), doi:10.1371/journal.pone.0054189.
- 655 13. M. Oren, A. M. Tarrant, S. Alon, N. Simon-blecher, I. Elbaz, *Sci. Rep.* **5**, 1–15 (2015).
- 656 14. A. Klarsfeld *et al.*, *J. Neurosci.* **24**, 1468–1477 (2004).
- 657 15. J. Hirsh *et al.*, *Curr. Biol.* **20**, 209–214 (2010).
- 658 16. T. Yoshii *et al.*, *J. Insect Physiol.* **50**, 479–488 (2004).
- 659 17. R. J. Konopka, C. Pittendrigh, D. Orr, *J. Neurogenet.* **6**, 1–10 (1998).
- 660 18. L. Kempinger, R. Dittmann, D. Rieger, C. Helfrich-Förster, *Chronobiol. Int.* **26**, 151–166 (2009).
- 661 19. W. Bachleitner, L. Kempinger, C. Wülbeck, D. Rieger, C. Helfrich-Förster, *Proc. Natl. Acad. Sci.*  
662 **104**, 3538–3543 (2007).
- 663 20. S. Vanin *et al.*, *Nature*. **484**, 371–375 (2012).
- 664 21. M. Schlichting, R. Grebler, P. Menegazzi, C. Helfrich-Förster, *J. Biol. Rhythms*. **30**, 117–128  
665 (2015).
- 666 22. E. Dolezelova, D. Dolezel, J. C. Hall, *Genetics*. **177**, 329–345 (2007).
- 667 23. M. Schlichting, C. Helfrich-Förster, *Methods Enzymol.* **552**, 105–123 (2015).

- 668 24. C. Kistenpfennig *et al.*, *J. Biol. Rhythms*. **33**, 24–34 (2018).
- 669 25. A. Berndt *et al.*, *J. Biol. Chem.* **282**, 13011–13021 (2007).
- 670 26. N. Hoang *et al.*, *PLoS Biol.* **6**, 1559–1569 (2008).
- 671 27. D. Arendt, K. Tessmar, M.-I. M. de Campos-Baptista, A. Dorresteyn, J. Wittbrodt, *Development*.  
672 **129**, 1143–54 (2002).
- 673 28. N. Randel, L. A. Bezares-Calderón, M. Gühmann, R. Shahidi, G. Jékely, *Integr. Comp. Biol.* **53**, 7–  
674 16 (2013).
- 675 29. B. Backfisch *et al.*, *Proc. Natl. Acad. Sci. U. S. A.* **110**, 193–8 (2013).
- 676 30. H. J. Bailes, R. J. Lucas, *Proc. R. Soc. B Biol. Sci.* **280** (2013), doi:10.1098/rspb.2012.2987.
- 677 31. R. Revilla-i-Domingo *et al.*, *bioRxiv* (2021), doi:10.1101/2021.01.10.426124.
- 678 32. A. Fischer, J. Brökelmann, *Zeitschrift für Zellforsch.* **71**, 217–244 (1966).
- 679 33. C. S. Pittendrigh, *Cold Spring Harb. Symp. Quant. Biol.* **25**, 159–184 (1960).
- 680 34. J. Aschoff, *Z. Tierpsychol.* **49**, 225–249 (1979).
- 681 35. C. M. Altimus *et al.*, *Nat. Neurosci.* **13**, 1107–1112 (2010).
- 682 36. D. Tran, M. Perrigault, P. Ciret, L. Payton, *Proc. R. Soc. B.* **287**, 1–9 (2020).
- 683 37. T. A. Wehr, *Nat. Publ. Gr.* **23**, 923–931 (2018).
- 684 38. S. Schenk *et al.*, *Elife.* **8**, 1–39 (2019).
- 685 39. B. Schmid, C. Helfrich-Förster, T. Yoshii, *J. Biol. Rhythms.* **26**, 464–467 (2011).
- 686 40. K. Tessmar-Raible, P. R. H. Steinmetz, H. Snyman, M. Hassel, D. Arendt, *Biotechniques.* **39**, 460–  
687 462 (2005).
- 688 41. J. Schindelin *et al.*, *Nat. Methods.* **9** (2009), doi:10.1038/nmeth.2019.
- 689 42. T. Yoshii, S. Vanin, R. Costa, C. Helfrich-Förster, **24**, 452–464 (2009).
- 690



691  
692  
693  
694  
695  
696  
697  
698  
699  
700  
701  
702  
703  
704  
705  
706  
707  
708  
709

## Supplementary Materials

### Two light sensors decode moonlight versus sunlight to adjust a plastic circadian/circlunidian clock to moon phase

Short title: Moonlight sets a plastic circadian/-lunidian clock

Martin Zurl<sup>1,2</sup>, Birgit Poehn<sup>1,2</sup>, Dirk Rieger<sup>3</sup>, Shruthi Krishnan<sup>4,5</sup>, Dunja Rokvic<sup>1,2</sup>, Vinoth Babu Veedin Rajan<sup>1,2</sup>, Elliot Gerrard<sup>6</sup>, Matthias Schlichting<sup>7</sup>, Lukas Orel<sup>1,2</sup>, Robert J. Lucas<sup>6</sup>, Eva Wolf<sup>4,5</sup>, Charlotte Helfrich-Förster<sup>3</sup>, Florian Raible<sup>1,2,@</sup> and Kristin Tessmar-Raible<sup>1,2,@</sup>

**This PDF file includes:**

Materials and Methods  
Figs. S1 to S4

**Other Supplementary Material for this manuscript includes the following:**

Movie S1

710 **Supplementary Figures**  
711

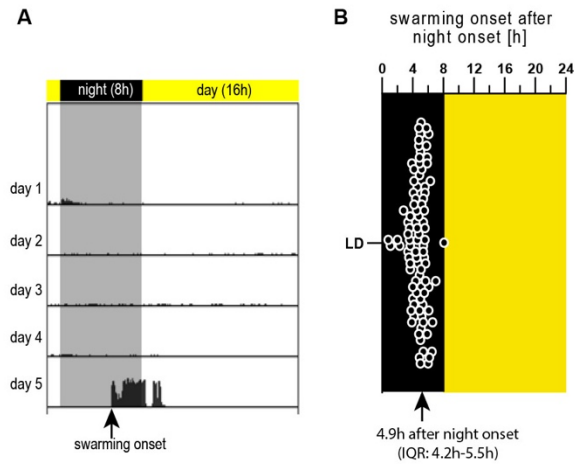

712

713 **Fig. S1 | Determination of the timing of swarming onset by tracking locomotor activity.** (A) Exemplary actogram  
714 showing locomotor activity of a sexually maturing worm during the days prior to swarming and in the night of  
715 swarming. Swarming onset is correlated with a striking increase in locomotor activity. See Supplementary Video  
716 1. (B) Coordinated swarming onset of separated worms that were kept under a 16h:8h LD cycle for at least 9 days  
717 prior to swarming (n=92). Median swarming onset was 4.9h after night onset (IQR: 4.2h-5.5h)

718

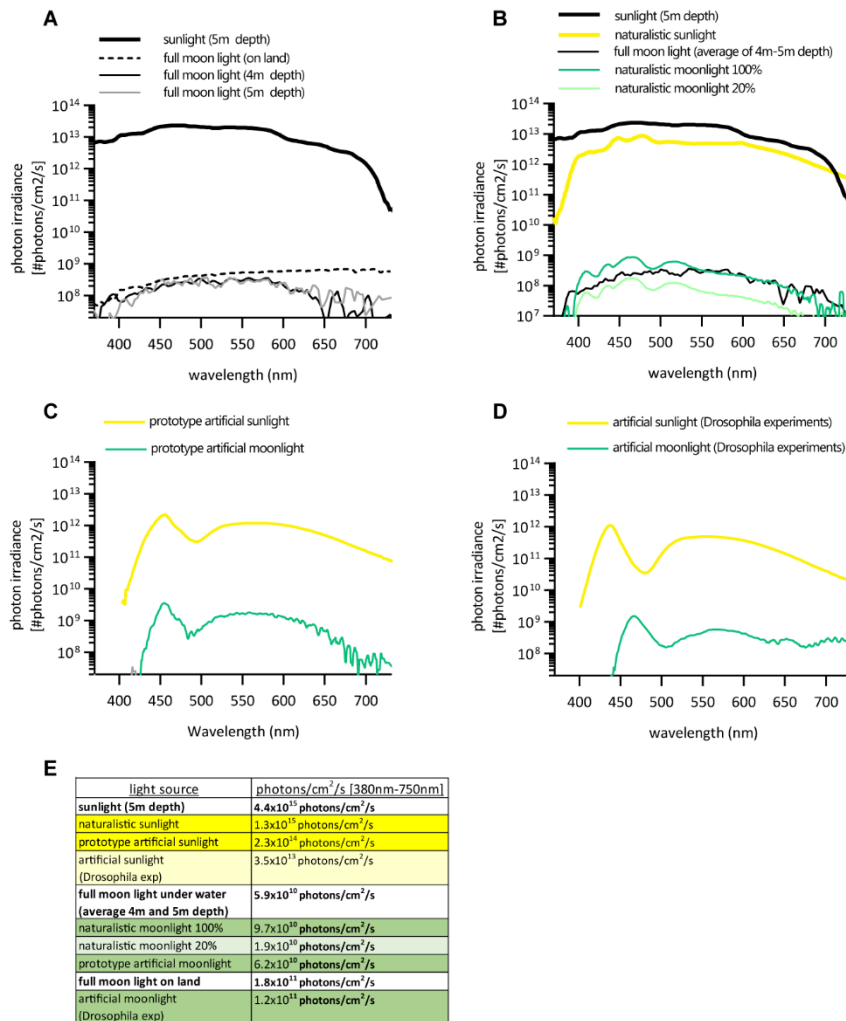

719

720

721 **Fig. S2 | Sun- and moonlight spectra. (A)** Exemplary natural sunlight and full moon spectra measured under water  
 722 at the natural *Platynereis* habitat in the coastal waters of Ischia/Italy. Sunlight spectrum was measured at 5m  
 723 water depth on 25.11.2011 (9.7x10<sup>10</sup> photons/cm<sup>2</sup>/s [380nm-750nm] average 10am-4pm), and the two full moon  
 724 spectra were measured at 4m and 5m water depth on 17.-18. April 2012 (average 10:15pm-2am) and 10.-11.2011  
 725 (average 10pm-1am), respectively. To benchmark the underwater moonlight measurements a publicly available  
 726 full moon light spectrum measured on land is included  
 727 (<http://www.olino.org/blog/us/articles/2015/10/05/spectrum-of-moon-light>). **(B)** Custom designed naturalistic  
 728 sun (yellow) and moonlight spectra (dark and light green) used for all *Platynereis* experiments (except for Fig.2E,  
 729 F, G and fig. S1) compared to natural sun and moonlight spectra. **(C)** Prototype artificial sun- and moonlight  
 730 spectra used for experiments shown in Fig. 1B and Fig.2 E,F,G. **(D)** Artificial sun and moonlight experiments used  
 731 for *Drosophila* experiments. **(E)** Total light intensities of the spectra shown in (A-D). All spectra reflect light  
 732 intensities at the distance relevant for experiments.

733

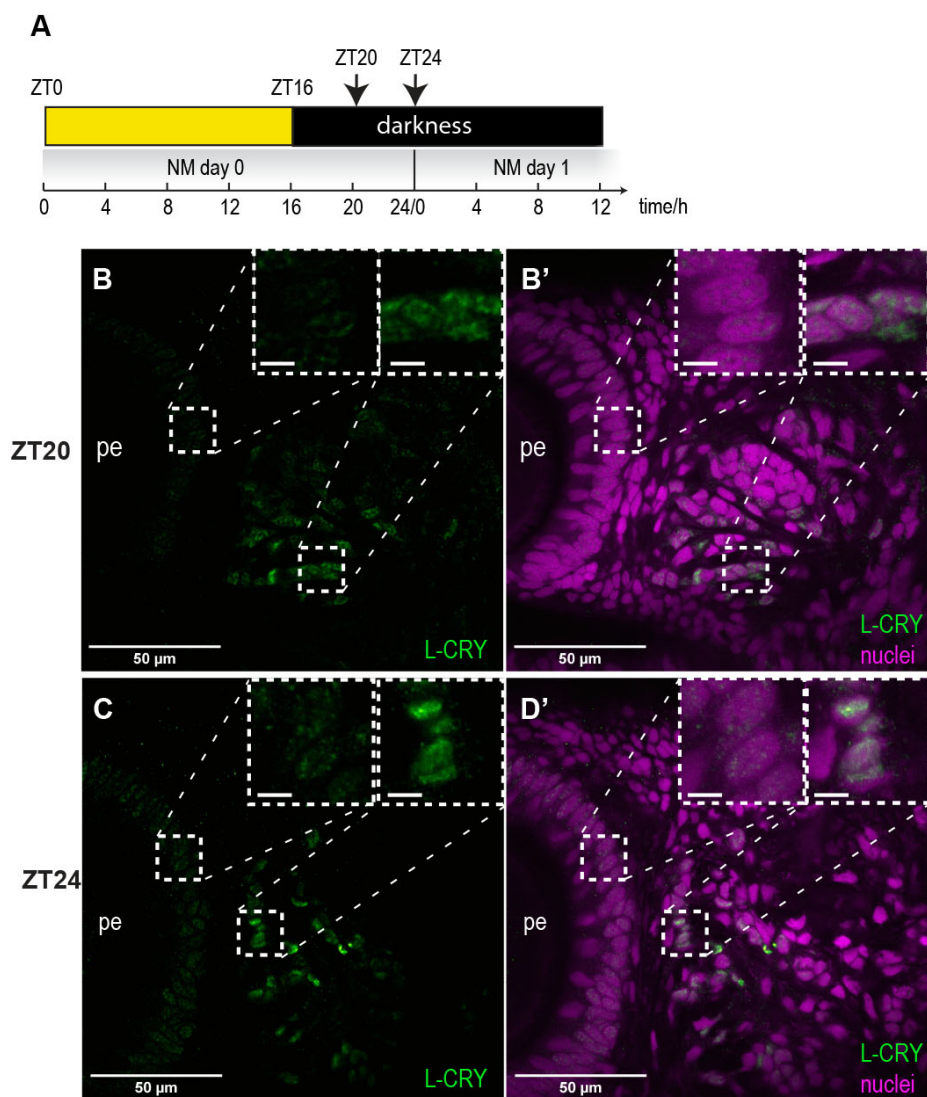

734

735 **Fig. S3 | L-Cry localizes to the nucleus during dark nights.**

736 **(A)** Sampling scheme of *Platynereis* heads for immunohistochemistry. **(B,C)** *Pdu*-L-Cry (green); **(B'C')** *Pdu*-L-Cry  
737 including nuclei stained with HOECHST (violet). For further details see Fig.3.

738

739

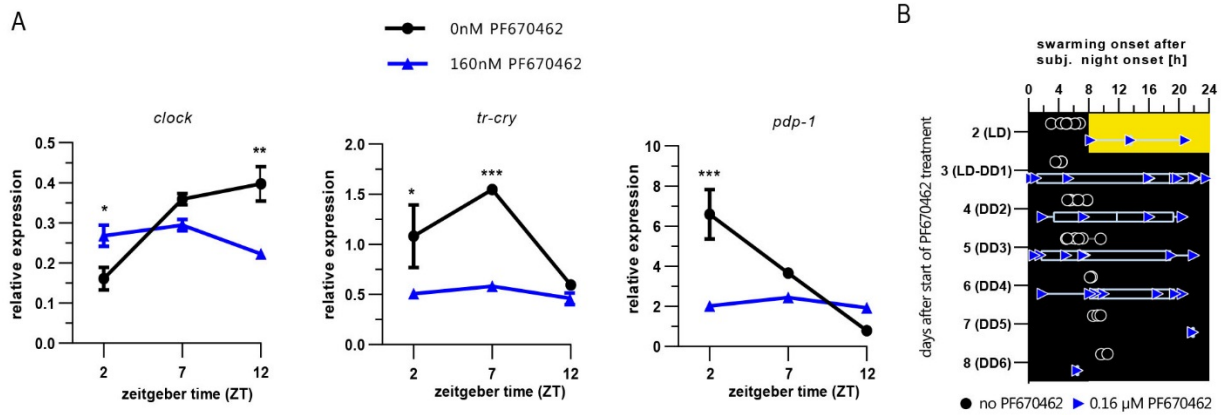

740

741 **Fig. S4 | Treatment with a casein kinase 1δ/ε inhibitor disrupts circadian clock oscillations and synchronized**  
 742 **swarming onset**

743 **(A)** Treatment of 160nM of casein kinase 1δ/ε inhibitor PF670462 results in severely disrupted circadian clock  
 744 gene transcriptional oscillations in head extracts of premature worms. Expression levels are normalized to *cdc5*  
 745 levels. **(B)** Swarming onset of worms after at least 9 days after last FM stimulus under LD followed by DD  
 746 conditions treated with the casein kinase 1δ/ε inhibitor PF670462 (blue triangles); untreated references (black  
 747 dots) include individuals also shown in Fig. 1C. Values are means ± SEM; n = 3BRs with 4-5 heads/BR. \* : p<0.05;  
 748 \*\* : p<0.001; \*\*\* : p<0.0001 2-way ANOVA followed by Sidak's multiple comparison test.

749

750 **Additional supplementary file**

751 **Supplementary Video 1 | Exemplary video showing mature swarming worms, as well as worms just**  
 752 **before swarming**
